# Supplementary material for: COVID-19 classification using thermal images
Source: PubMed Central journal article supplement (PMC9116467; doi:10.1117/1.jbo.27.5.056003), 2022-05-18
Supplement: JBO_027_056003_SD001.pdf [file JBO_027_056003_SD001.pdf]

# Appendix A: Supplemental Material

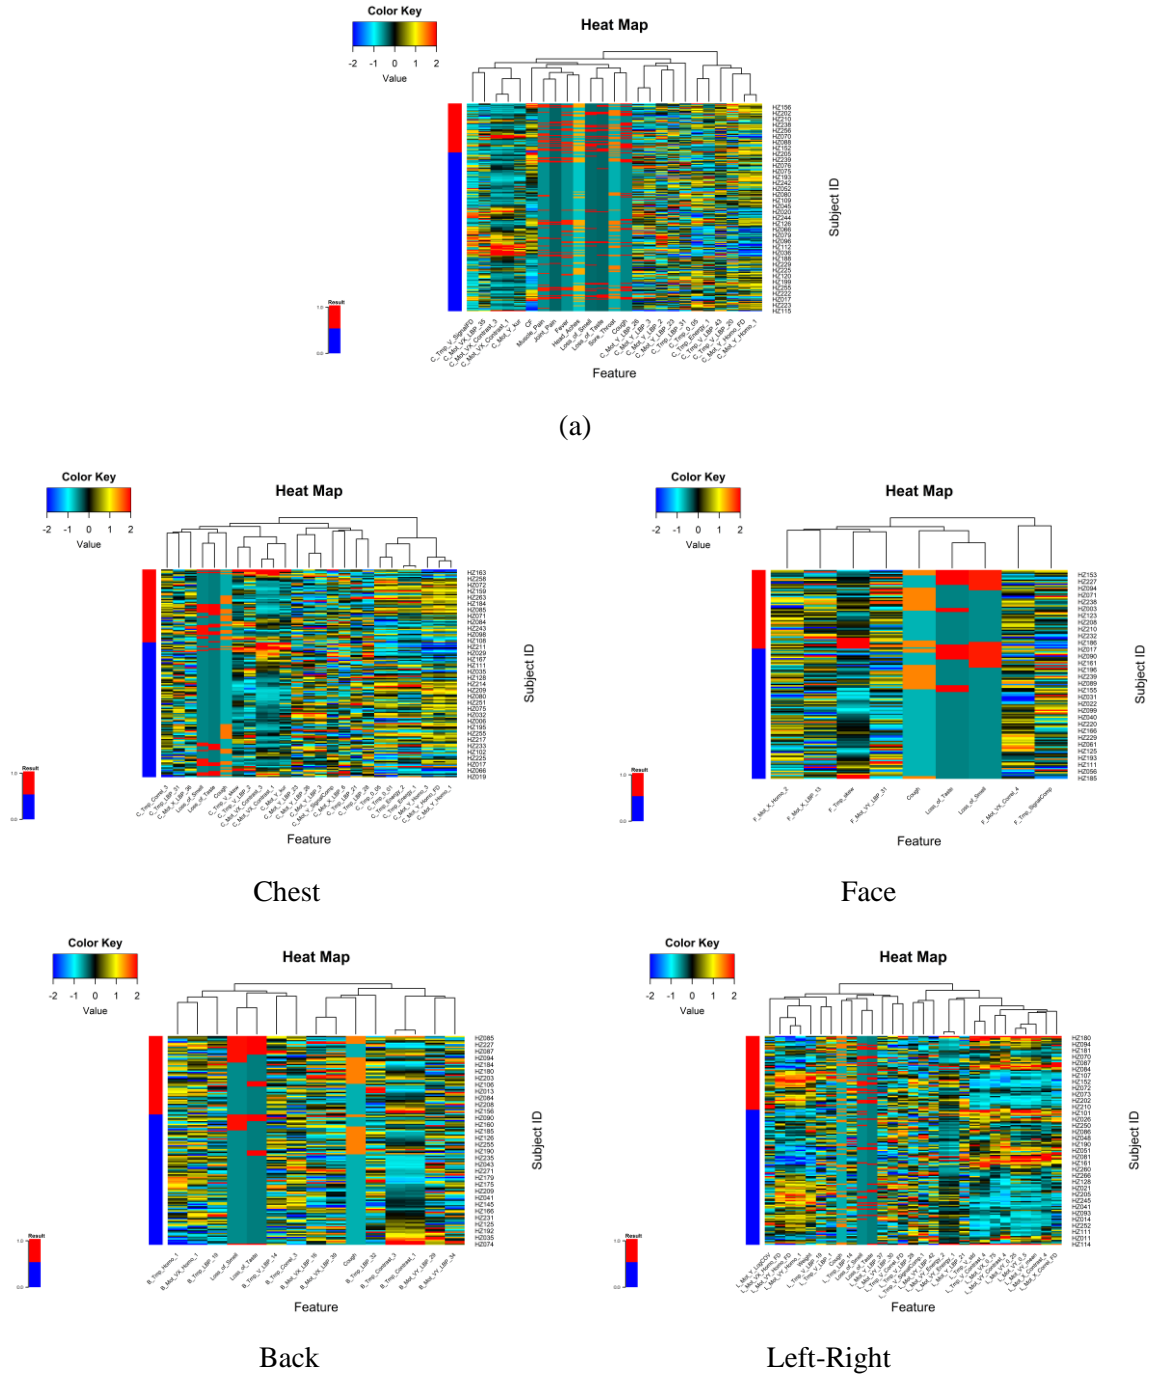

**Fig. 1** Heat maps of top selected features for the chest view analysis. (a) Chest ROI: All subjects. (b) Only symptomatic subjects.

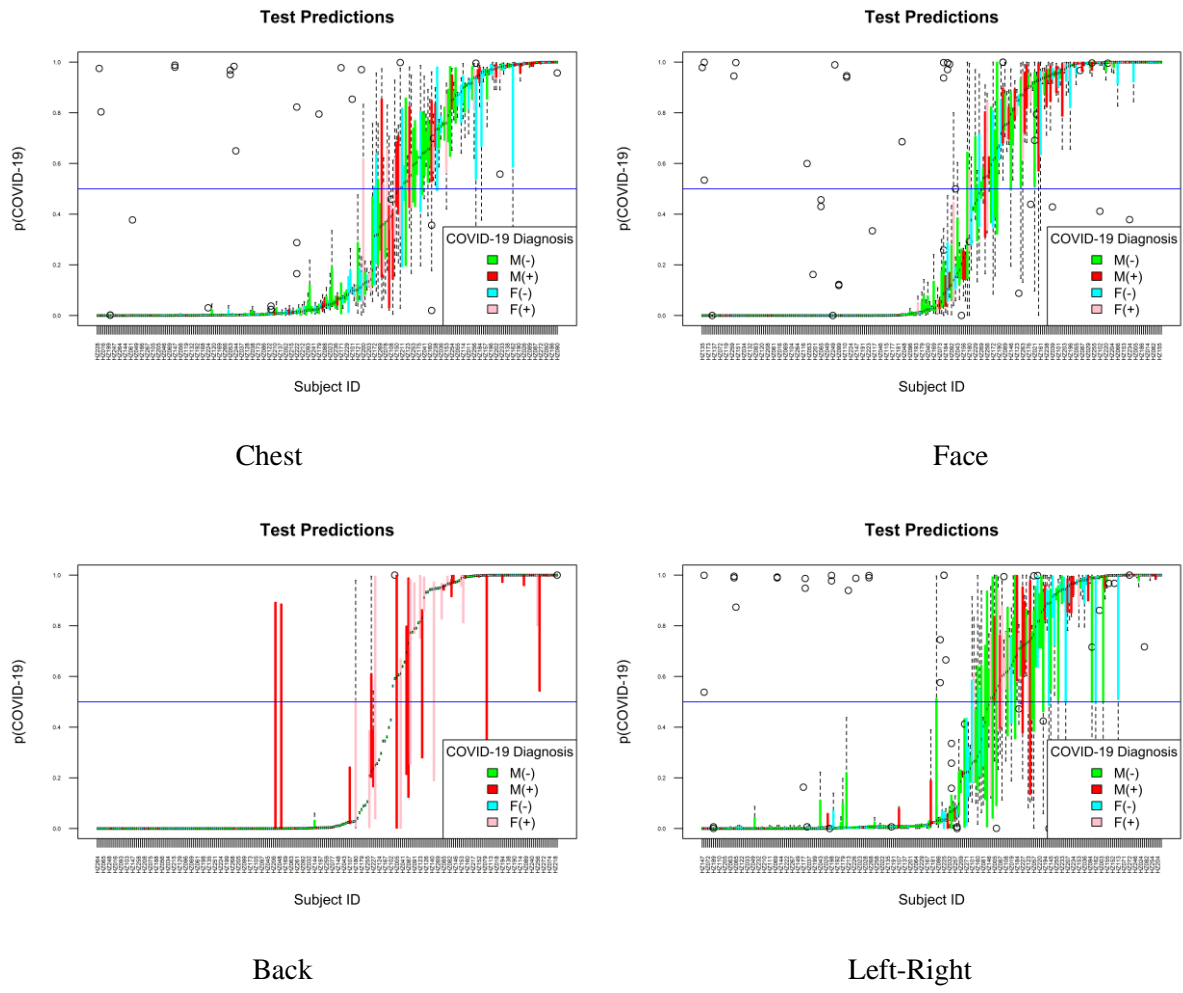

**Fig. 2** Test results of each one of the 500 repetitions of the Random CrossValidation for the four explored body ROIs

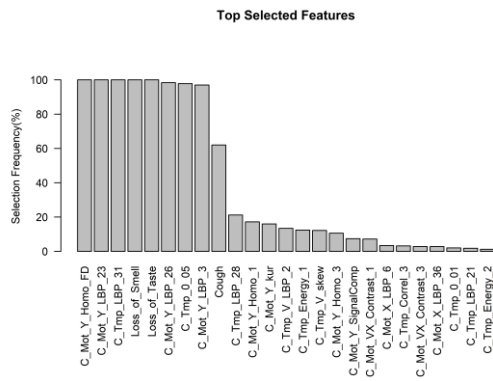

**Chest**

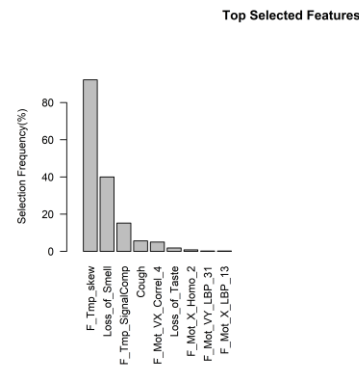

**Face**

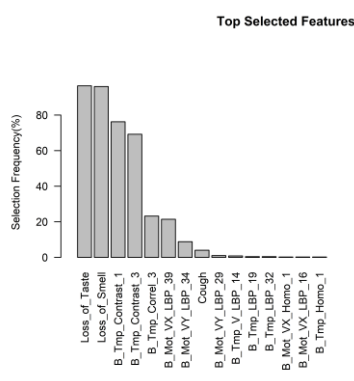

**Back**

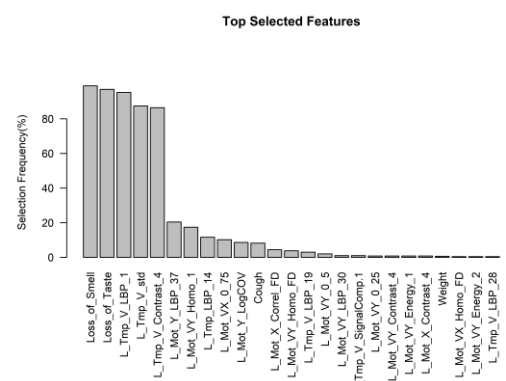

**Left-Right**

**Fig. 3** Selection Frequency of Thermal Features at the different Body ROI

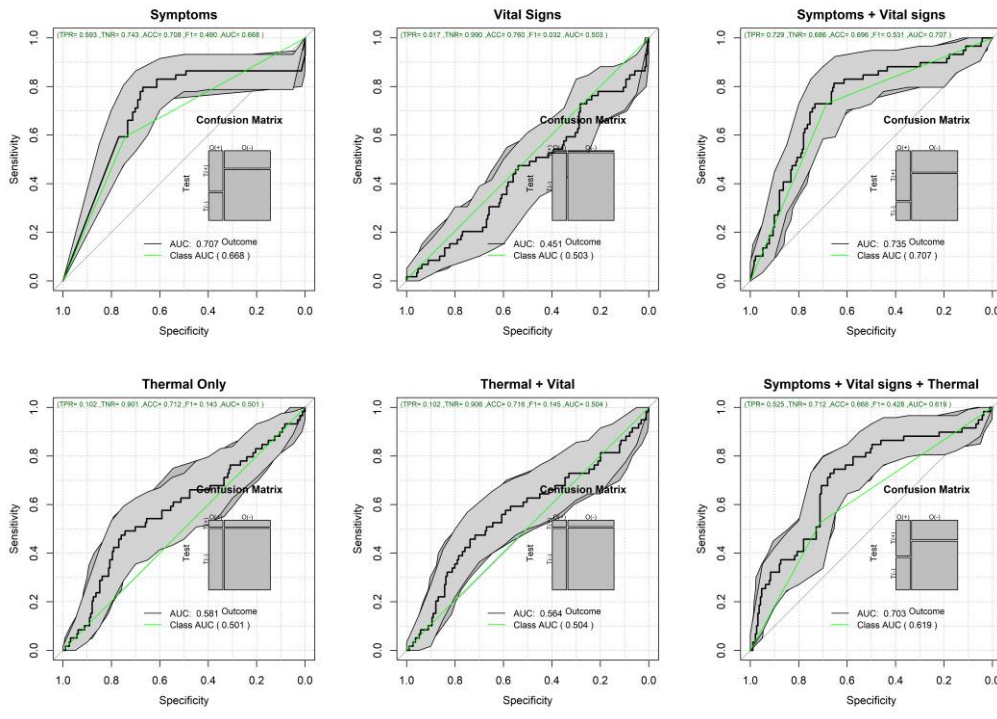

(a)

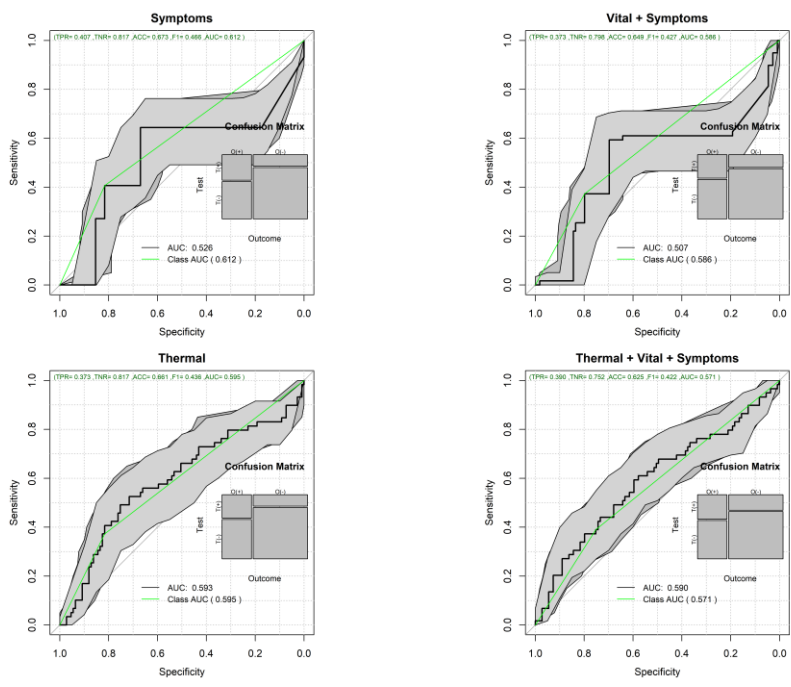

(b)

**Fig. 4** ROC plots of the chest view using male and female subjects. (a) All subject data. (b) Only symptomatic subjects

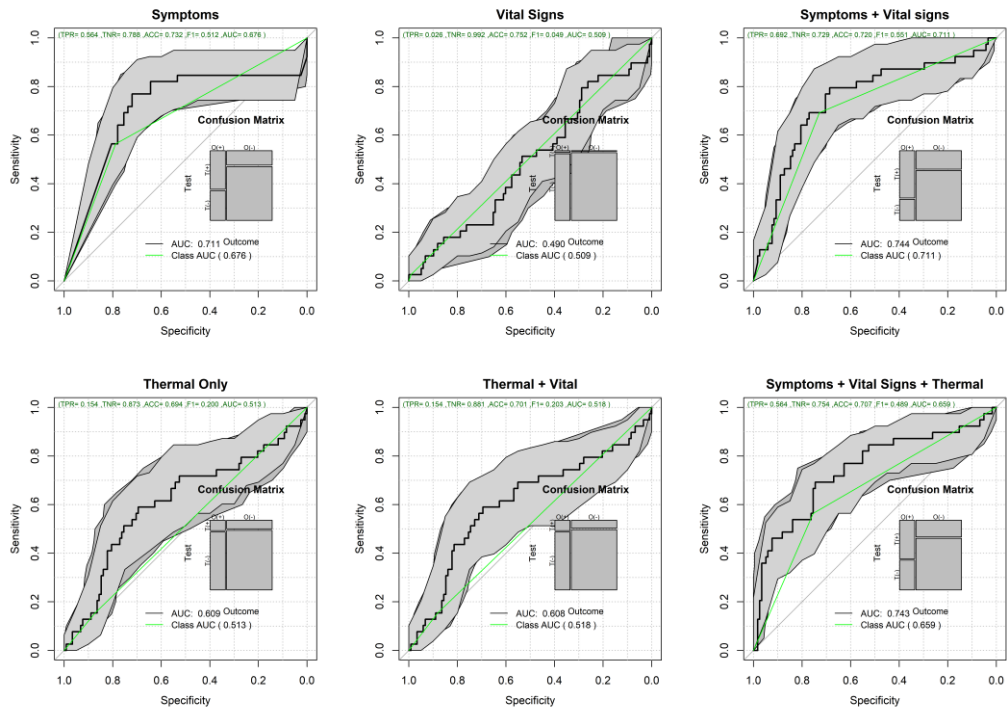

(a)

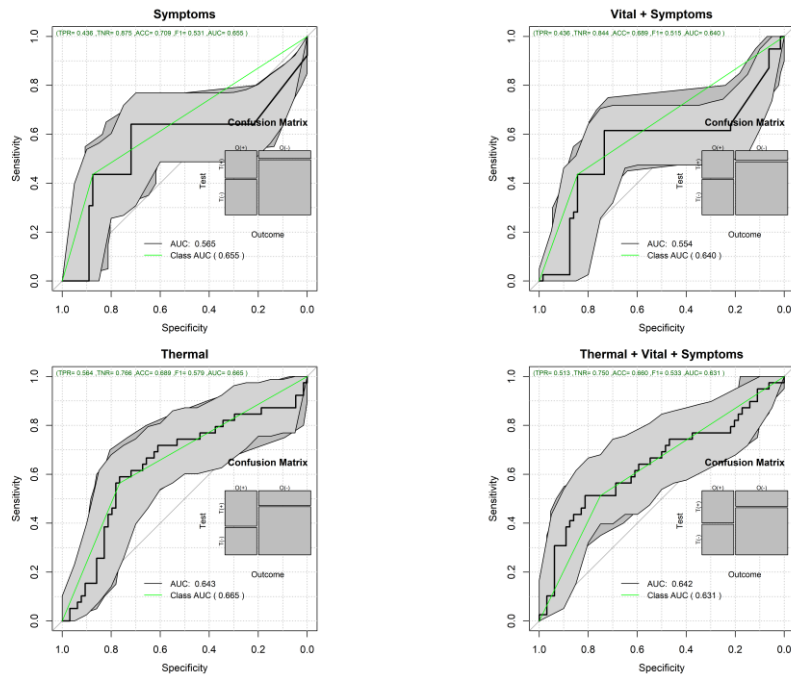

(b)

**Fig. 5** ROC plots of the chest view form males. (a) All subject data. (b) Only symptomatic subjects

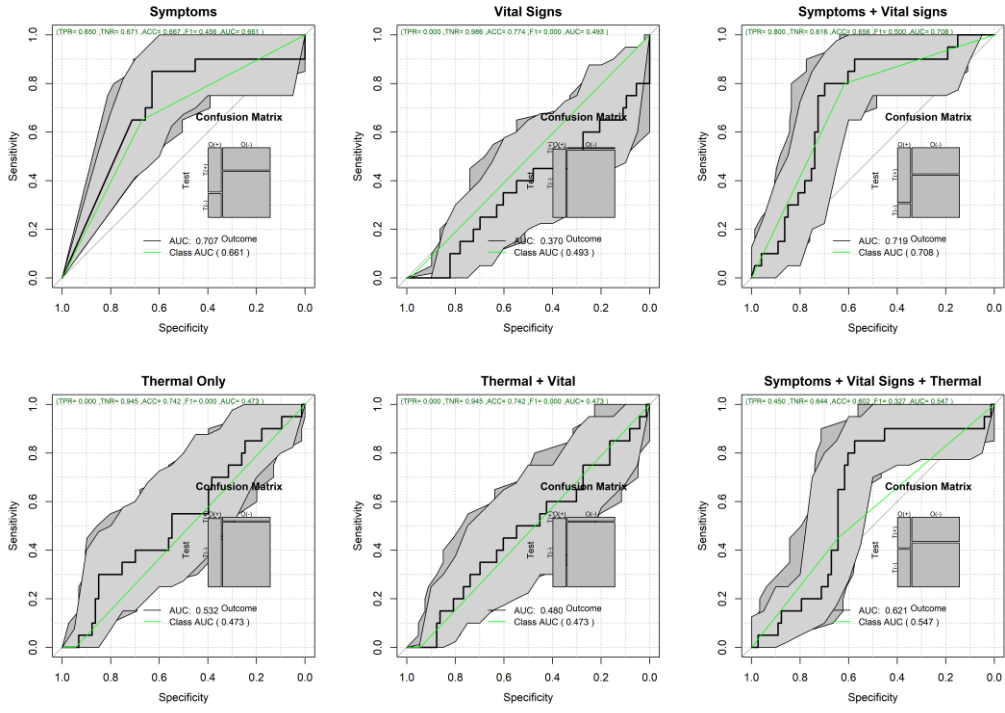

(a)

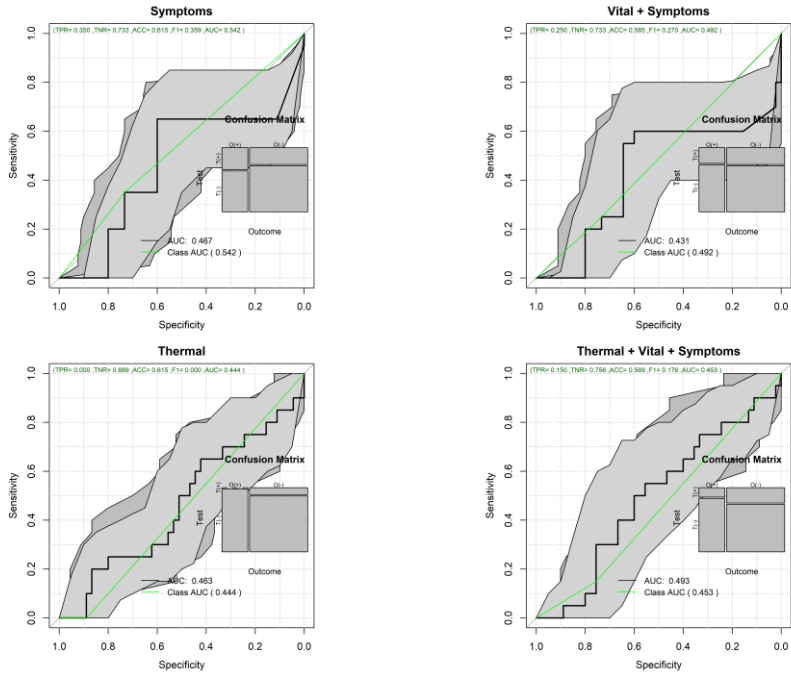

(b)

**Fig. 6** ROC plots of the chest view for female subjects. (a) All subject data. (b) Only symptomatic subjects

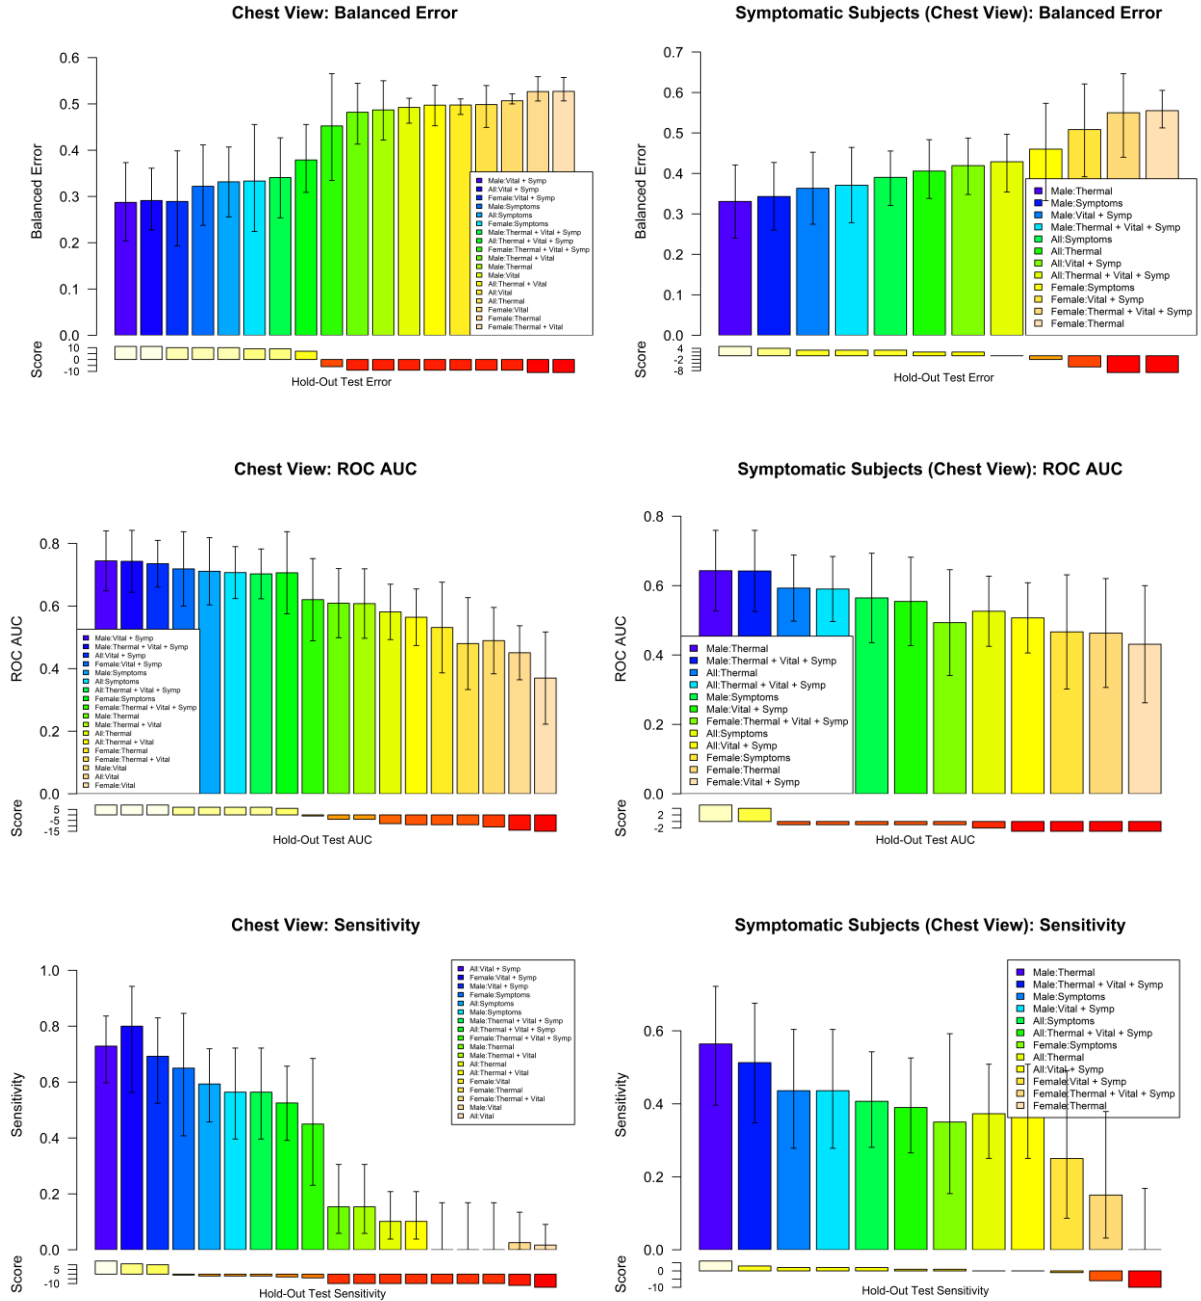

Fig. 7 Comparisons of key metrics for all subjects and symptomatic subjects of the chest view.

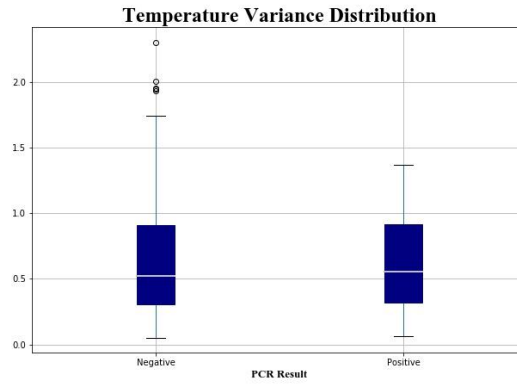

**Fig. 8** Temperature variance distribution participants during the video capturing stratified by PCR results.

**Table 1** Balanced error rate (BER) for all subject analysis

| BER                               | Thermal                     |                             |                             |                             |                             |
|-----------------------------------|-----------------------------|-----------------------------|-----------------------------|-----------------------------|-----------------------------|
|                                   | No Imaging                  | Chest                       | Face                        | Back                        | Left-Right                  |
| <b>All:Symptoms</b>               | <b>0.332</b><br>(0.26-0.41) |                             |                             |                             |                             |
| <b>All:Vital</b>                  | 0.498<br>(0.48-0.51)        |                             |                             |                             |                             |
| <b>All:Vital + Symp</b>           | <b>0.291</b><br>(0.23-0.36) |                             |                             |                             |                             |
| <b>All:Thermal</b>                |                             | 0.499<br>(0.45-0.54)        | 0.512<br>(0.49-0.53)        | 0.518<br>(0.49-0.54)        | 0.535<br>(0.52-0.55)        |
| <b>All:Thermal + Vital</b>        |                             | 0.497<br>(0.45-0.54)        | 0.512<br>(0.49-0.53)        | 0.518<br>(0.49-0.54)        | 0.532<br>(0.52-0.55)        |
| <b>All:Thermal + Vital + Symp</b> |                             | <b>0.379</b><br>(0.31-0.46) | <b>0.310</b><br>(0.24-0.39) | <b>0.310</b><br>(0.24-0.38) | <b>0.300</b><br>(0.24-0.37) |
| <b>Male:Symptoms</b>              | <b>0.322</b><br>(0.24-0.41) |                             |                             |                             |                             |
| <b>Male:Vital</b>                 | 0.492<br>(0.46-0.51)        |                             |                             |                             |                             |
| <b>Male:Vital + Symp</b>          | <b>0.287</b><br>(0.20-0.37) |                             |                             |                             |                             |
| <b>Male:Thermal</b>               |                             | 0.487<br>(0.42-0.55)        | 0.515<br>(0.48-0.54)        | 0.522<br>(0.48-0.56)        | 0.555<br>(0.53-0.59)        |
| <b>Male:Thermal + Vital</b>       |                             | 0.482<br>(0.41-0.54)        | 0.514<br>(0.48-0.54)        | 0.518<br>(0.48-0.55)        | 0.550<br>(0.53-0.58)        |



|                                      |                                    |                                    |                                    |                                    |                                    |
|--------------------------------------|------------------------------------|------------------------------------|------------------------------------|------------------------------------|------------------------------------|
| <b>Male:Thermal + Vital + Symp</b>   |                                    | <b>0.341</b><br><b>(0.25-0.43)</b> | <b>0.293</b><br><b>(0.21-0.38)</b> | <b>0.315</b><br><b>(0.23-0.40)</b> | <b>0.296</b><br><b>(0.21-0.38)</b> |
| <b>Female:Symptoms</b>               | <b>0.333</b><br><b>(0.22-0.46)</b> |                                    |                                    |                                    |                                    |
| <b>Female:Vital</b>                  | 0.507<br>(0.50-0.52)               |                                    |                                    |                                    |                                    |
| <b>Female:Vital + Symp</b>           | <b>0.289</b><br><b>(0.19-0.40)</b> |                                    |                                    |                                    |                                    |
| <b>Female:Thermal</b>                |                                    | 0.527<br>(0.51-0.56)               | 0.507<br>(0.50-0.53)               | 0.508<br>(0.50-0.53)               | 0.500<br>(0.50-0.50)               |
| <b>Female:Thermal + Vital</b>        |                                    | 0.527<br>(0.51-0.56)               | 0.507<br>(0.50-0.52)               | 0.516<br>(0.50-0.54)               | 0.500<br>(0.50-0.50)               |
| <b>Female:Thermal + Vital + Symp</b> |                                    | 0.452<br>(0.33-0.57)               | <b>0.344</b><br><b>(0.23-0.47)</b> | <b>0.303</b><br><b>(0.20-0.43)</b> | <b>0.306</b><br><b>(0.20-0.41)</b> |

**Table 2** Area under the ROC for all subjec analysis

| AUC                                  | Thermal                            |                                    |                                    |                                    |                                    |
|--------------------------------------|------------------------------------|------------------------------------|------------------------------------|------------------------------------|------------------------------------|
|                                      | No Imaging                         | Chest                              | Face                               | Back                               | Left-Right                         |
| <b>All:Symptoms</b>                  | <b>0.707</b><br><b>(0.62-0.79)</b> |                                    |                                    |                                    |                                    |
| <b>All:Vital</b>                     | 0.451<br>(0.36-0.54)               |                                    |                                    |                                    |                                    |
| <b>All:Vital + Symp</b>              | <b>0.735</b><br><b>(0.66-0.81)</b> |                                    |                                    |                                    |                                    |
| <b>All:Thermal</b>                   |                                    | 0.581<br>(0.49-0.67)               | 0.505<br>(0.41-0.60)               | 0.357<br>(0.28-0.43)               | 0.307<br>(0.23-0.38)               |
| <b>All:Thermal + Vital</b>           |                                    | 0.564<br>(0.47-0.66)               | 0.523<br>(0.43-0.61)               | 0.352<br>(0.27-0.43)               | 0.331<br>(0.25-0.41)               |
| <b>All:Thermal + Vital + Symp</b>    |                                    | <b>0.703</b><br><b>(0.62-0.78)</b> | <b>0.686</b><br><b>(0.60-0.77)</b> | <b>0.717</b><br><b>(0.64-0.80)</b> | <b>0.700</b><br><b>(0.62-0.78)</b> |
| <b>Male:Symptoms</b>                 | 0.711<br>(0.60-0.82)               |                                    |                                    |                                    |                                    |
| <b>Male:Vital</b>                    | 0.490<br>(0.38-0.60)               |                                    |                                    |                                    |                                    |
| <b>Male:Vital + Symp</b>             | <b>0.744</b><br><b>(0.65-0.84)</b> |                                    |                                    |                                    |                                    |
| <b>Male:Thermal</b>                  |                                    | 0.609<br>(0.50-0.72)               | 0.519<br>(0.41-0.63)               | 0.354<br>(0.26-0.45)               | 0.309<br>(0.22-0.40)               |
| <b>Male:Thermal + Vital</b>          |                                    | 0.608<br>(0.50-0.72)               | 0.546<br>(0.43-0.66)               | 0.338<br>(0.24-0.44)               | 0.336<br>(0.24-0.43)               |
| <b>Male:Thermal + Vital + Symp</b>   |                                    | 0.743<br>(0.64-0.84)               | 0.713<br>(0.61-0.82)               | 0.715<br>(0.61-0.82)               | 0.717<br>(0.61-0.82)               |
| <b>Female:Symptoms</b>               | <b>0.707</b><br><b>(0.58-0.84)</b> |                                    |                                    |                                    |                                    |
| <b>Female:Vital</b>                  | 0.370<br>(0.22-0.52)               |                                    |                                    |                                    |                                    |
| <b>Female:Vital + Symp</b>           | <b>0.719</b><br><b>(0.60-0.84)</b> |                                    |                                    |                                    |                                    |
| <b>Female:Thermal</b>                |                                    | 0.532<br>(0.39-0.68)               | 0.475<br>(0.32-0.63)               | 0.357<br>(0.22-0.49)               | 0.307<br>(0.18-0.44)               |
| <b>Female:Thermal + Vital</b>        |                                    | 0.480<br>(0.33-0.63)               | 0.475<br>(0.33-0.63)               | 0.374<br>(0.24-0.51)               | 0.328<br>(0.19-0.46)               |
| <b>Female:Thermal + Vital + Symp</b> |                                    | 0.621<br>(0.49-0.75)               | <b>0.642</b><br><b>(0.51-0.78)</b> | <b>0.707</b><br><b>(0.59-0.83)</b> | <b>0.665</b><br><b>(0.53-0.80)</b> |

**Table 3** Sensitivity for selecting COVID-19 patients using all subjects.

| Sensitivity                          | Thermal              |                      |                      |                      |                      |
|--------------------------------------|----------------------|----------------------|----------------------|----------------------|----------------------|
|                                      | No Imaging           | Chest                | Face                 | Back                 | Left-Right           |
| <b>All:Symptoms</b>                  | 0.593<br>(0.46-0.72) |                      |                      |                      |                      |
| <b>All:Vital</b>                     | 0.017<br>(0.00-0.09) |                      |                      |                      |                      |
| <b>All:Vital + Symp</b>              | 0.729<br>(0.60-0.84) |                      |                      |                      |                      |
| <b>All:Thermal</b>                   |                      | 0.102<br>(0.04-0.21) | 0.017<br>(0.00-0.09) | 0.017<br>(0.00-0.09) | 0.000<br>(0.00-0.06) |
| <b>All:Thermal + Vital</b>           |                      | 0.102<br>(0.04-0.21) | 0.017<br>(0.00-0.09) | 0.017<br>(0.00-0.09) | 0.000<br>(0.00-0.06) |
| <b>All:Thermal + Vital + Symp</b>    |                      | 0.525<br>(0.39-0.66) | 0.672<br>(0.54-0.79) | 0.644<br>(0.51-0.76) | 0.678<br>(0.54-0.79) |
| <b>Male:Symptoms</b>                 | 0.564<br>(0.40-0.72) |                      |                      |                      |                      |
| <b>Male:Vital</b>                    | 0.026<br>(0.00-0.13) |                      |                      |                      |                      |
| <b>Male:Vital + Symp</b>             | 0.692<br>(0.52-0.83) |                      |                      |                      |                      |
| <b>Male:Thermal</b>                  |                      | 0.154<br>(0.06-0.31) | 0.026<br>(0.00-0.14) | 0.026<br>(0.00-0.13) | 0.000<br>(0.00-0.09) |
| <b>Male:Thermal + Vital</b>          |                      | 0.154<br>(0.06-0.31) | 0.026<br>(0.00-0.14) | 0.026<br>(0.00-0.13) | 0.000<br>(0.00-0.09) |
| <b>Male:Thermal + Vital + Symp</b>   |                      | 0.564<br>(0.40-0.72) | 0.658<br>(0.49-0.80) | 0.615<br>(0.45-0.77) | 0.641<br>(0.47-0.79) |
| <b>Female:Symptoms</b>               | 0.650<br>(0.41-0.85) |                      |                      |                      |                      |
| <b>Female:Vital</b>                  | 0.000<br>(0.00-0.17) |                      |                      |                      |                      |
| <b>Female:Vital + Symp</b>           | 0.800<br>(0.56-0.94) |                      |                      |                      |                      |
| <b>Female:Thermal</b>                |                      | 0.000<br>(0.00-0.17) | 0.000<br>(0.00-0.17) | 0.000<br>(0.00-0.17) | 0.000<br>(0.00-0.17) |
| <b>Female:Thermal + Vital</b>        |                      | 0.000<br>(0.00-0.17) | 0.000<br>(0.00-0.17) | 0.000<br>(0.00-0.17) | 0.000<br>(0.00-0.17) |
| <b>Female:Thermal + Vital + Symp</b> |                      | 0.450<br>(0.23-0.68) | 0.700<br>(0.46-0.88) | 0.700<br>(0.46-0.88) | 0.750<br>(0.51-0.91) |

**Table 4** Balanced Error Rate for symptomatic subjects

| BER                                  | Thermal                            |                                    |                                    |                      |                      |
|--------------------------------------|------------------------------------|------------------------------------|------------------------------------|----------------------|----------------------|
|                                      | No Imaging                         | Chest                              | Face                               | Back                 | Left-Right           |
| <b>All:Symptoms</b>                  | <b>0.390</b><br><b>(0.32-0.46)</b> |                                    |                                    |                      |                      |
| <b>All:Vital + Symp</b>              | <b>0.419</b><br><b>(0.35-0.49)</b> |                                    |                                    |                      |                      |
| <b>All:Thermal</b>                   |                                    | <b>0.406</b><br><b>(0.34-0.48)</b> | <b>0.442</b><br><b>(0.38-0.50)</b> | 0.531<br>(0.49-0.58) | 0.476<br>(0.42-0.54) |
| <b>All:Thermal + Vital + Symp</b>    |                                    | <b>0.429</b><br><b>(0.35-0.50)</b> | 0.506<br>(0.44-0.57)               | 0.455<br>(0.38-0.53) | 0.479<br>(0.41-0.55) |
| <b>Male:Symptoms</b>                 | <b>0.343</b><br><b>(0.26-0.43)</b> |                                    |                                    |                      |                      |
| <b>Male:Vital + Symp</b>             | <b>0.363</b><br><b>(0.27-0.45)</b> |                                    |                                    |                      |                      |
| <b>Male:Thermal</b>                  |                                    | <b>0.331</b><br><b>(0.24-0.42)</b> | 0.440<br>(0.36-0.51)               | 0.502<br>(0.44-0.57) | 0.438<br>(0.37-0.51) |
| <b>Male:Thermal + Vital + Symp</b>   |                                    | <b>0.371</b><br><b>(0.28-0.46)</b> | 0.503<br>(0.43-0.57)               | 0.442<br>(0.35-0.53) | 0.479<br>(0.39-0.57) |
| <b>Female:Symptoms</b>               | 0.460<br>(0.33-0.57)               |                                    |                                    |                      |                      |
| <b>Female:Vital + Symp</b>           | 0.508<br>(0.39-0.62)               |                                    |                                    |                      |                      |
| <b>Female:Thermal</b>                |                                    | 0.555<br>(0.51-0.61)               | 0.456<br>(0.34-0.55)               | 0.583<br>(0.53-0.65) | 0.541<br>(0.44-0.63) |
| <b>Female:Thermal + Vital + Symp</b> |                                    | 0.550<br>(0.44-0.65)               | 0.502<br>(0.39-0.61)               | 0.478<br>(0.35-0.59) | 0.489<br>(0.37-0.60) |

**Table 5** Area under de ROC curve for only symptomatic subjects

| AUC                                  | Thermal              |                                    |                                    |                                    |                      |
|--------------------------------------|----------------------|------------------------------------|------------------------------------|------------------------------------|----------------------|
|                                      | No Imaging           | Chest                              | Face                               | Back                               | Left-Right           |
| <b>All:Symptoms</b>                  | 0.526<br>(0.43-0.63) |                                    |                                    |                                    |                      |
| <b>All:Vital + Symp</b>              | 0.507<br>(0.41-0.61) |                                    |                                    |                                    |                      |
| <b>All:Thermal</b>                   |                      | <b>0.593</b><br><b>(0.50-0.69)</b> | <b>0.595</b><br><b>(0.50-0.69)</b> | 0.386<br>(0.30-0.48)               | 0.567<br>(0.48-0.66) |
| <b>All:Thermal + Vital + Symp</b>    |                      | <b>0.590</b><br><b>(0.50-0.68)</b> | 0.466<br>(0.37-0.56)               | 0.561<br>(0.47-0.66)               | 0.570<br>(0.48-0.66) |
| <b>Male:Symptoms</b>                 | 0.565<br>(0.44-0.69) |                                    |                                    |                                    |                      |
| <b>Male:Vital + Symp</b>             | 0.554<br>(0.43-0.68) |                                    |                                    |                                    |                      |
| <b>Male:Thermal</b>                  |                      | <b>0.643</b><br><b>(0.53-0.76)</b> | 0.575<br>(0.46-0.69)               | 0.452<br>(0.34-0.57)               | 0.594<br>(0.48-0.71) |
| <b>Male:Thermal + Vital + Symp</b>   |                      | <b>0.642</b><br><b>(0.53-0.76)</b> | 0.431<br>(0.31-0.55)               | <b>0.613</b><br><b>(0.50-0.73)</b> | 0.580<br>(0.46-0.70) |
| <b>Female:Symptoms</b>               | 0.467<br>(0.30-0.63) |                                    |                                    |                                    |                      |
| <b>Female:Vital + Symp</b>           | 0.431<br>(0.26-0.60) |                                    |                                    |                                    |                      |
| <b>Female:Thermal</b>                |                      | 0.463<br>(0.31-0.62)               | <b>0.629</b><br><b>(0.47-0.79)</b> | 0.244<br>(0.12-0.37)               | 0.531<br>(0.38-0.68) |
| <b>Female:Thermal + Vital + Symp</b> |                      | 0.493<br>(0.34-0.65)               | 0.504<br>(0.34-0.67)               | 0.459<br>(0.29-0.63)               | 0.549<br>(0.40-0.70) |

**Table 6** Sensitivity of the model for symptomatic subjects

| Sensitivity                          | Thermal              |                      |                      |                      |                      |
|--------------------------------------|----------------------|----------------------|----------------------|----------------------|----------------------|
|                                      | No Imaging           | Chest                | Face                 | Back                 | Left-Right           |
| <b>All:Symptoms</b>                  | 0.407<br>(0.28-0.54) |                      |                      |                      |                      |
| <b>All:Vital + Symp</b>              | 0.373<br>(0.25-0.51) |                      |                      |                      |                      |
| <b>All:Thermal</b>                   |                      | 0.373<br>(0.25-0.51) | 0.207<br>(0.11-0.33) | 0.068<br>(0.02-0.17) | 0.186<br>(0.10-0.31) |
| <b>All:Thermal + Vital + Symp</b>    |                      | 0.390<br>(0.27-0.53) | 0.155<br>(0.07-0.27) | 0.288<br>(0.18-0.42) | 0.271<br>(0.16-0.40) |
| <b>Male:Symptoms</b>                 | 0.436<br>(0.28-0.60) |                      |                      |                      |                      |
| <b>Male:Vital + Symp</b>             | 0.436<br>(0.28-0.60) |                      |                      |                      |                      |
| <b>Male:Thermal</b>                  |                      | 0.564<br>(0.40-0.72) | 0.211<br>(0.10-0.37) | 0.103<br>(0.03-0.24) | 0.205<br>(0.09-0.37) |
| <b>Male:Thermal + Vital + Symp</b>   |                      | 0.513<br>(0.35-0.68) | 0.132<br>(0.04-0.28) | 0.308<br>(0.17-0.48) | 0.282<br>(0.15-0.45) |
| <b>Female:Symptoms</b>               | 0.350<br>(0.15-0.59) |                      |                      |                      |                      |
| <b>Female:Vital + Symp</b>           | 0.250<br>(0.09-0.49) |                      |                      |                      |                      |
| <b>Female:Thermal</b>                |                      | 0.000<br>(0.00-0.17) | 0.200<br>(0.06-0.44) | 0.000<br>(0.00-0.17) | 0.150<br>(0.03-0.38) |
| <b>Female:Thermal + Vital + Symp</b> |                      | 0.150<br>(0.03-0.38) | 0.200<br>(0.06-0.44) | 0.250<br>(0.09-0.49) | 0.250<br>(0.09-0.49) |
